# Supplementary material
Source: PubMed Central journal article supplement (PMC3826155)
Supplement: NIHMS520396-supplement-supp__data.pdf [file NIHMS520396-supplement-supp__data.pdf]

Supplemental Table 1.

Characteristics of patients who met study eligibility criteria

| Variables                                                           | NIMA mismatched transplantations | NIMA matched transplantations | P-value |
|---------------------------------------------------------------------|----------------------------------|-------------------------------|---------|
| Number                                                              | 456                              | 52                            |         |
| Region                                                              |                                  |                               |         |
| Europe                                                              | 196 (43%)                        | 28 (54%)                      | NS      |
| United States                                                       | 260 (57%)                        | 24 (46%)                      |         |
| Sex, male                                                           | 240 (53%)                        | 26 (50%)                      | NS      |
| Median age (range), years                                           | 10 (<1 – 68)                     | 12 (<1 – 67)                  |         |
| Age                                                                 |                                  |                               |         |
| ≤10 years                                                           | 235 (52%)                        | 24 (46%)                      | NS      |
| 11 – 20 years                                                       | 85 (19%)                         | 8 (15%)                       |         |
| 21 – 50 years                                                       | 102 (22%)                        | 13 (25%)                      |         |
| >50 years                                                           | 34 (7%)                          | 7 (13%)                       |         |
| Recipient CMV serostatus                                            |                                  |                               | NS      |
| Negative                                                            | 196 (43%)                        | 21 (40%)                      |         |
| Positive                                                            | 233 (51%)                        | 27 (53%)                      |         |
| Not reported                                                        | 27 (6%)                          | 4 (8%)                        |         |
| Disease                                                             |                                  |                               | NS      |
| Acute myeloid leukemia                                              | 163 (36%)                        | 21 (40%)                      |         |
| Acute lymphoblastic leukemia                                        | 171 (38%)                        | 19 (37%)                      |         |
| Chronic myeloid leukemia                                            | 13 (3%)                          | 2 (4%)                        |         |
| Myelodysplastic syndrome                                            | 56 (12%)                         | 4 (8%)                        |         |
| Other leukemia                                                      | 19 (5%)                          | 4 (8%)                        |         |
| Non-Hodgkin lymphoma                                                | 34 (7%)                          | 2 (4%)                        |         |
| Disease status                                                      |                                  |                               | NS      |
| 1 <sup>st</sup> complete remission /chronic phase                   | 118 (26%)                        | 14 (27%)                      |         |
| 2 <sup>nd</sup> complete remission /chronic phase/accelerated phase | 202 (44%)                        | 22 (42%)                      |         |
| Relapse / blast phase                                               | 136 (30%)                        | 16 (31%)                      |         |
| TNC infused median (range) x 10 <sup>7</sup> /kg                    | 4 (1 – 27)                       | 3.9 (0.8 – 9.9)               |         |

Supplemental table 1. Continued

| Variables                                    | NIMA mismatched transplantations | NIMA matched transplantations | P-value |
|----------------------------------------------|----------------------------------|-------------------------------|---------|
| Conditioning regimen                         |                                  |                               | NS      |
| TBI, myeloablative                           | 246 (54%)                        | 21 (40%)                      |         |
| Non-TBI myeloablative                        | 143 (31%)                        | 17 (33%)                      |         |
| TBI reduced intensity                        | 40 (9%)                          | 10 (19%)                      |         |
| Non-TBI reduced intensity                    | 27 (6%)                          | 4 (8%)                        |         |
| Conditioning regimen                         |                                  |                               |         |
| TBI ( $\geq 1000$ cGy) + Cy                  | 342 (53%)                        | 21 (40%)                      |         |
| TBI (200 cGy) + Cy                           | 40 (9%)                          | 10 (19%)                      |         |
| Busulphan + melphalan                        | 57 (13%)                         | 7 (13%)                       |         |
| Busulfan ( $>9$ mg/kg) + Cy                  | 83 (18%)                         | 10 (19%)                      |         |
| Busulfan ( $<9$ mg/kg) + FLU                 | 6 (1%)                           | 1 (2%)                        |         |
| Melphalan ( $>150$ mg/m <sup>2</sup> ) + FLU | 3 (1%)                           | —                             |         |
| Melphalan ( $<150$ mg/m <sup>2</sup> ) + FLU | 11 (2%)                          | 2 (4%)                        |         |
| Cy + FLU                                     | 10 (2%)                          | 1 (2%)                        |         |
| GVHD prophylaxis                             |                                  |                               | NS      |
| Cyclosporine + steroids                      | 186 (41%)                        | 22 (43%)                      |         |
| Cyclosporine + methotrexate                  | 32 (7%)                          | 5 (9%)                        |         |
| Cyclosporine + MMF                           | 119 (26%)                        | 16 (30%)                      |         |
| Cyclosporine alone                           | 34 (7%)                          | 3 (6%)                        |         |
| Tacrolimus + methotrexate                    | 37 (8%)                          | 3 (6%)                        |         |
| Tacrolimus + MMF                             | 29 (6%)                          | 1 (2%)                        |         |
| Tacrolimus alone                             | 19 (4%)                          | 2 (4%)                        |         |
| <i>In vivo</i> t-cell depletion              |                                  |                               | NS      |
| ATG/alemtuzumab                              | 298 (65%)                        | 33 (63%)                      |         |
| None                                         | 145 (32%)                        | 17 (33%)                      |         |
| Not reported                                 | 13 (3%)                          | 2 (4%)                        |         |
| Donor-recipient HLA match                    |                                  |                               | 0.0002  |
| 5/6 HLA match                                | 307 (47%)                        | 14 (26%)                      |         |
| 4/6 HLA match                                | 256 (39%)                        | 38 (74%)                      |         |

Abbreviations

NIMA = non inherited maternal antigen; CMV = cytomegalovirus; TNC = total nucleated cell dose; TBI = total body irradiation; Cy = cyclophosphamide; FLU = fludarabine; MMF = mycophenolate mofetil; ATG = anti-thymocyte globulin; HLA = human leukocyte antigen

Supplemental Table 2:

Risk factors for transplant-related mortality after HLA-mismatched umbilical cord blood transplant

| Variable                                                                       | Relative Risk | P-value |
|--------------------------------------------------------------------------------|---------------|---------|
| Age                                                                            |               |         |
| ≤16 years                                                                      | 1.00          |         |
| >16 years                                                                      | 2.00          | <0.001  |
| Donor-recipient HLA match                                                      |               |         |
| 1-antigen mismatch                                                             | 1.00          |         |
| 2-antigen mismatch                                                             | 1.36          | 0.06    |
| Disease status at transplant                                                   |               |         |
| Not in remission                                                               | 1.00          |         |
| 1 <sup>st</sup> complete remission/1 <sup>st</sup> chronic phase               | 0.54          | 0.01    |
| 2 <sup>nd</sup> complete remission/2 <sup>nd</sup> chronic e/accelerated phase | 0.68          | 0.09    |
| Transplant conditioning regimen                                                |               |         |
| Reduced intensity non-TBI regimen                                              | 1.00          |         |
| Myeloablative TBI regimen                                                      | 0.84          | 0.60    |
| Myeloablative non-TBI regimen                                                  | 0.54          | 0.07    |
| Reduced intensity TBI regimen                                                  | 0.24          | 0.002   |

Abbreviation

TBI = total body irradiation
